# Supplementary material
Source: MDPI journal article supplement (https://www.mdpi.com/2073-4344/9/4/334)
Supplement: s1 [file s1]

## Supplementary Materials (SM)

**Table S1:** TOF values in function of catalyst load in the benzaldehyde acetalization reaction catalyzed by Fe5F.

| Catalyst load / %<br>mol | 0.5        | 1.0          | 2.0         | 4.0         |
|--------------------------|------------|--------------|-------------|-------------|
| TOF / h <sup>-1</sup>    | 162 ± 3.44 | 86.2 ± 0.982 | 90.6 ± 1.31 | 33.5 ± 1.06 |

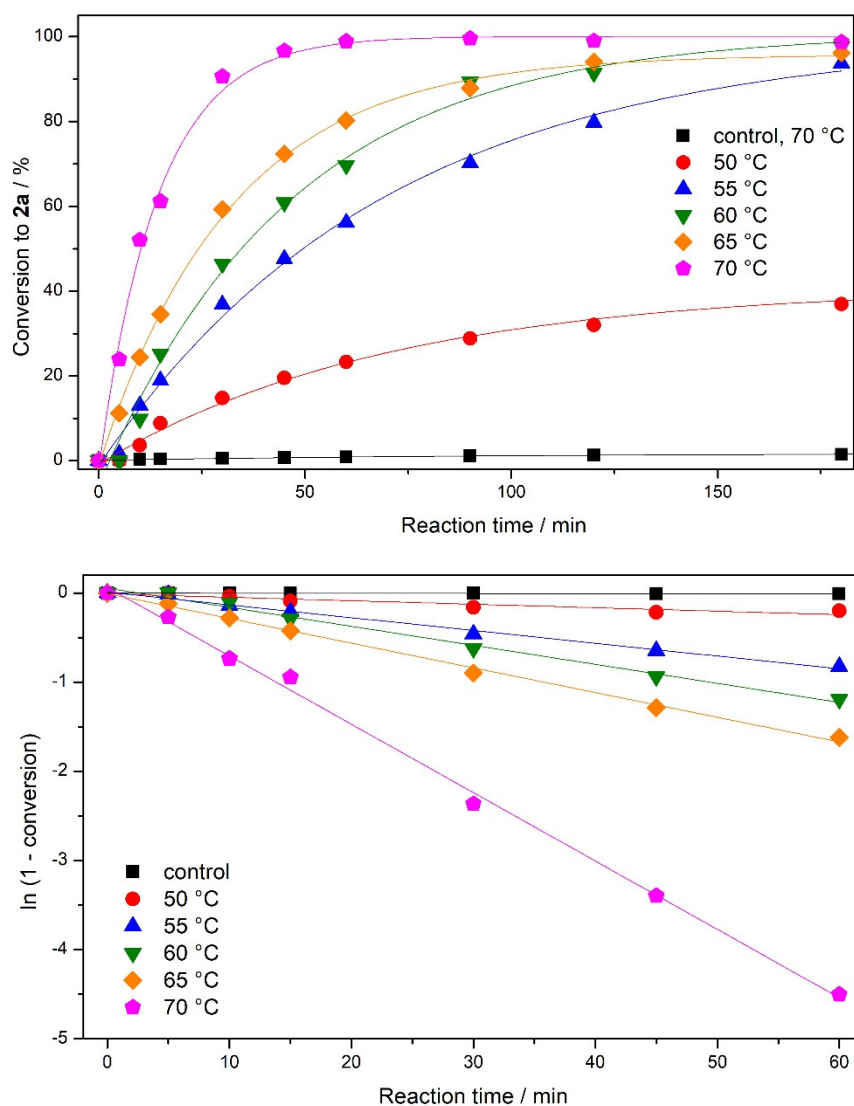

**Figure S1.** Kinetic behavior for synthesis of **2a** in the presence of TEOF, catalyzed by Fe5F in different temperatures: (a) conversion values in function of time and (b) data linearization according to exponential first-order adjust.

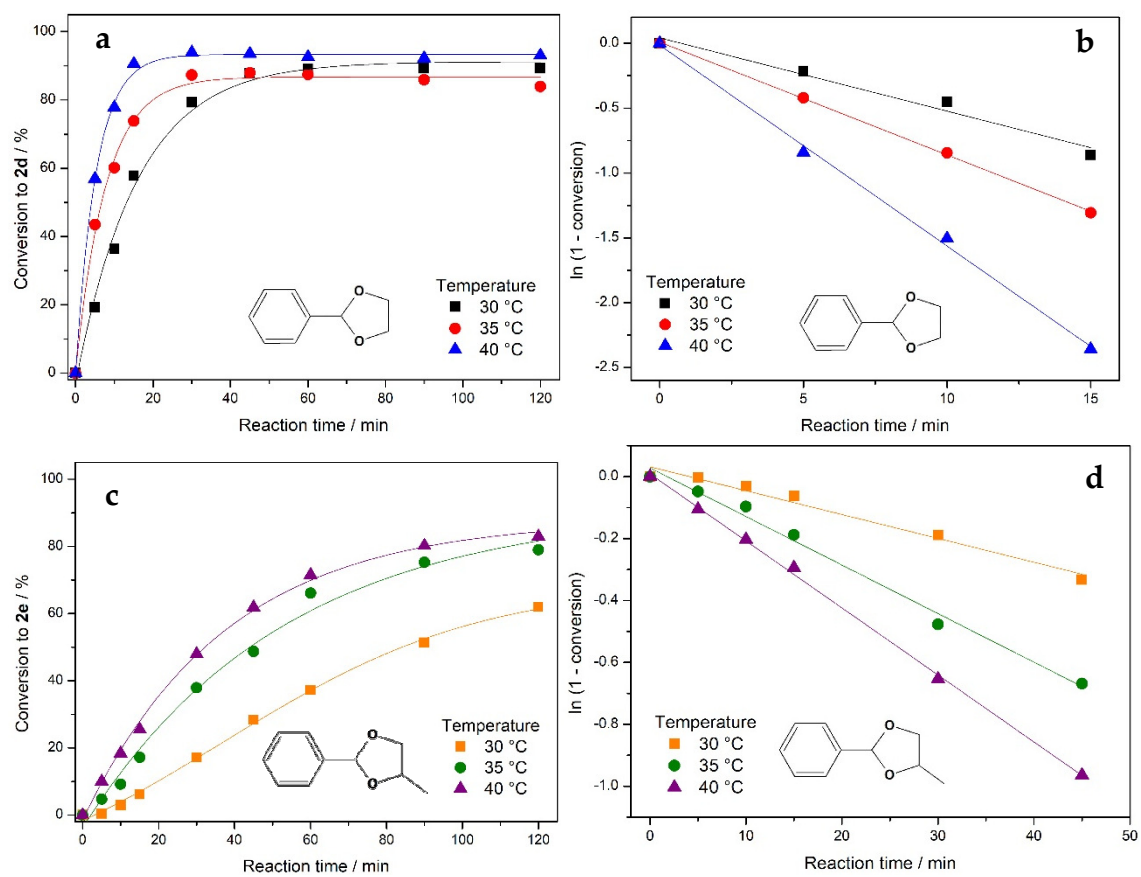

**Figure S2.** Kinetic behavior for benzaldehyde's cyclic acetals synthesis catalyzed by Fe5F: (a) conversion to **2d** in function of time and (b) its linearized data; (c) conversion to **2e** in function of time and (d) its linearized data.
